# Supplementary material for: Assessment of DCE Utility for PCa Diagnosis Using PI-RADS v2.1: Effects on Diagnostic Accuracy and Reproducibility
Source: PubMed Central journal article supplement (PMC7151226; doi:10.3390/diagnostics10030164), 2020-03-17
Supplement: diagnostics-10-00164-s001.pdf [file diagnostics-10-00164-s001.pdf]

## Supplementary Materials

### Scores of mpMRI-based PI-RADS and bpMRI-based PI-RADS

The three readers classified prostate lesions according to PI-RADS scoring in different proportions, except for PI-RADS scores of 1 and 5, which were assigned respectively to 0 and 32 lesions by all 3 radiologists, using either mpMRI protocol or bpMRI protocol. Using mpMRI, PI-RADS scores of 2, 3, and 4 were respectively attributed to 25, 17 and 43 lesions by reader 1; 35, 9, 41 lesions by reader 2; 27, 15 and 43 lesions by reader 3. Omitting DCE, PI-RADS scores of 2, 3, and 4 were respectively attributed to 27, 43 and 15 lesions by reader 1; 36, 28, 21 lesions by reader 2; 28, 35 and 22 lesions by reader 3. Immediately evident is the higher variability of PI-RADS scored as 3 among the radiologists. Moreover, a marked increase of lesions attributed to a PI-RADS score of 3, at the expense to a decrease of lesions attributed to a PI-RADS score of 4, was evident without the inclusion of DCE in the PI-RADS scoring.

| PI-RADS v2.1 score | mpMRI-based  |              |              |              |              |              |              |              |              | bpMRI-based  |              |              |              |              |              |              |              |              |
|--------------------|--------------|--------------|--------------|--------------|--------------|--------------|--------------|--------------|--------------|--------------|--------------|--------------|--------------|--------------|--------------|--------------|--------------|--------------|
|                    | R1           |              |              | R2           |              |              | R3           |              |              | R1           |              |              | R2           |              |              | R3           |              |              |
|                    | All (%)      | n PCa (%)    | n CS-PCa (%) | All (%)      | n PCa (%)    | n CS-PCa (%) | All (%)      | n PCa (%)    | n CS-PCa (%) | All (%)      | n PCa (%)    | n CS-PCa (%) | All (%)      | n PCa (%)    | n CS-PCa (%) | All (%)      | n PCa (%)    | n CS-PCa (%) |
| <b>1</b>           | 0<br>(0)     | 0<br>(0)     | 0<br>(0)     | 0<br>(0)     | 0<br>(0)     | 0<br>(0)     | 0<br>(0)     | 0<br>(0)     | 0<br>(0)     | 0<br>(0)     | 0<br>(0)     | 0<br>(0)     | 0<br>(0)     | 0<br>(0)     | 0<br>(0)     | 0<br>(0)     | 0<br>(0)     | 0<br>(0)     |
| <b>2</b>           | 25<br>(21.3) | 5<br>(4.3)   | 0<br>(0)     | 35<br>(29.9) | 9<br>(7.7)   | 1<br>(0.8)   | 27<br>(23.1) | 7<br>(6)     | 0<br>(0)     | 27<br>(23.1) | 7<br>(6)     | 0<br>(0)     | 36<br>(30.8) | 9<br>(7.7)   | 1<br>(0.8)   | 28<br>(23.9) | 8<br>(6.8)   | 0<br>(0)     |
| <b>3</b>           | 17<br>(14.5) | 9<br>(7.7)   | 3<br>(2.6)   | 9<br>(7.7)   | 5<br>(4.3)   | 3<br>(2.6)   | 15<br>(12.8) | 7<br>(6)     | 4<br>(3.4)   | 43<br>(36.8) | 28<br>(23.9) | 12<br>(10.3) | 28<br>(23.9) | 22<br>(18.8) | 8<br>(6.8)   | 35<br>(29.9) | 22<br>(18.8) | 8<br>(6.8)   |
| <b>4</b>           | 43<br>(36.8) | 33<br>(28.2) | 16<br>(13.7) | 41<br>(35)   | 33<br>(28.2) | 15<br>(12.8) | 43<br>(36.8) | 33<br>(28.2) | 15<br>(12.8) | 15<br>(12.8) | 12<br>(10.3) | 7<br>(6)     | 21<br>(17.9) | 16<br>(13.7) | 10<br>(8.5)  | 22<br>(18.8) | 17<br>(14.5) | 11<br>(9.4)  |
| <b>5</b>           | 32<br>(27.4) | 31<br>(26.5) | 22<br>(18.8) | 32<br>(27.4) | 31<br>(26.5) | 22<br>(18.8) | 32<br>(27.4) | 31<br>(26.5) | 22<br>(18.8) | 32<br>(27.4) | 31<br>(26.5) | 22<br>(18.8) | 32<br>(27.4) | 31<br>(26.5) | 22<br>(18.8) | 32<br>(27.4) | 31<br>(26.5) | 22<br>(18.8) |
| <b>Total</b>       | 117<br>(100) | 78<br>(66.7) | 41<br>(35)   | 117<br>(100) | 78<br>(66.7) | 41<br>(35)   | 117<br>(100) | 78<br>(66.7) | 41<br>(35)   | 117<br>(100) | 78<br>(66.7) | 41<br>(35)   | 117<br>(100) | 78<br>(66.7) | 41<br>(35)   | 117<br>(100) | 78<br>(66.7) | 41<br>(35)   |

**Table S1:** PI-RADS v2.1 scores assigned to each of the 117 lesions by each radiologist using both an mpMRI-based approach and a bpMRI-based one, with relative rates (number and percentage) of PCa lesions and CS-PCa lesions. “All” stands for All PCa lesions; PCa = prostate cancer; CS-PCa = clinically significant prostate cancer (defined as Gleason score > 3+3); R1 = reader 1; R2 = reader 2; R3 = reader 3.

## Crosstabs for inter-reader agreement

Crosstabs for mpMRI-based PI-RADS v2.1 considering all lesions (n = 117)

| Radiologist2_withDCE | Radiologist1_withDCE |               |               |               | Total (%)  |
|----------------------|----------------------|---------------|---------------|---------------|------------|
|                      | 2                    | 3             | 4             | 5             |            |
| 2                    | 25                   | 9             | 1             | 0             | 35 (29,9%) |
| 3                    | 0                    | 5             | 4             | 0             | 9 (7,7%)   |
| 4                    | 0                    | 3             | 38            | 0             | 41 (35,0%) |
| 5                    | 0                    | 0             | 0             | 32            | 32 (27,4%) |
| <b>Total (%)</b>     | 25<br>(21,4%)        | 17<br>(14,5%) | 43<br>(36,8%) | 32<br>(27,4%) | 117        |

**Table S2:** Crosstab for inter-reader agreement between radiologist 1 and radiologist 2.

| Radiologist3_withDCE | Radiologist1_withDCE |               |               |               | Total (%)  |
|----------------------|----------------------|---------------|---------------|---------------|------------|
|                      | 2                    | 3             | 4             | 5             |            |
| 2                    | 24                   | 3             | 0             | 0             | 27 (23,1%) |
| 3                    | 1                    | 11            | 3             | 0             | 15 (12,8%) |
| 4                    | 0                    | 3             | 40            | 0             | 43 (36,8%) |
| 5                    | 0                    | 0             | 0             | 32            | 32 (27,4%) |
| <b>Total (%)</b>     | 25<br>(21,4%)        | 17<br>(14,5%) | 43<br>(36,8%) | 32<br>(27,4%) | 117        |

**Table S3:** Crosstab for inter-reader agreement between radiologist 1 and radiologist 3.

| Radiologist3_withDCE | Radiologist2_withDCE |             |               |               | Total (%)  |
|----------------------|----------------------|-------------|---------------|---------------|------------|
|                      | 2                    | 3           | 4             | 5             |            |
| 2                    | 27                   | 0           | 0             | 0             | 27 (23,1%) |
| 3                    | 7                    | 7           | 1             | 0             | 15 (12,8%) |
| 4                    | 1                    | 2           | 40            | 0             | 43 (36,8%) |
| 5                    | 0                    | 0           | 0             | 32            | 32 (27,4%) |
| <b>Total (%)</b>     | 35<br>(29,9%)        | 9<br>(7,7%) | 41<br>(35,0%) | 32<br>(27,4%) | 117        |

**Table S4:** Crosstab for inter-reader agreement between radiologist 2 and radiologist 3.

**Crosstabs for bpMRI-based PI-RADS v2.1 considering all lesions (n = 117)**

|                           | <b>Radiologist1_noDCE</b> |               |               |               | <b>Total (%)</b> |
|---------------------------|---------------------------|---------------|---------------|---------------|------------------|
| <b>Radiologist2_noDCE</b> | <b>2</b>                  | <b>3</b>      | <b>4</b>      | <b>5</b>      |                  |
| <b>2</b>                  | 27                        | 9             | 0             | 0             | 36 (30,8%)       |
| <b>3</b>                  | 0                         | 25            | 3             | 0             | 28 (23,9%)       |
| <b>4</b>                  | 0                         | 9             | 12            | 0             | 21 (17,9%)       |
| <b>5</b>                  | 0                         | 0             | 0             | 32            | 32 (27,4%)       |
| <b>Total (%)</b>          | 27<br>(23,1%)             | 43<br>(36,8%) | 15<br>(12,8%) | 32<br>(27,4%) | 117              |

**Table S5:** Crosstab for inter-reader agreement between radiologist 1 and radiologist 2.

|                           | <b>Radiologist1_noDCE</b> |               |               |               | <b>Total (%)</b> |
|---------------------------|---------------------------|---------------|---------------|---------------|------------------|
| <b>Radiologist3_noDCE</b> | <b>2</b>                  | <b>3</b>      | <b>4</b>      | <b>5</b>      |                  |
| <b>2</b>                  | 26                        | 2             | 0             | 0             | 28 (23,9%)       |
| <b>3</b>                  | 1                         | 31            | 3             | 0             | 35 (29,9%)       |
| <b>4</b>                  | 0                         | 10            | 12            | 0             | 22 (18,8%)       |
| <b>5</b>                  | 0                         | 0             | 0             | 32            | 32 (27,4%)       |
| <b>Total (%)</b>          | 27<br>(23,1%)             | 43<br>(36,8%) | 15<br>(12,8%) | 32<br>(27,4%) | 117              |

**Table S6:** Crosstab for inter-reader agreement between radiologist 1 and radiologist 3.

|                           | <b>Radiologist2_noDCE</b> |               |               |               | <b>Total (%)</b> |
|---------------------------|---------------------------|---------------|---------------|---------------|------------------|
| <b>Radiologist3_noDCE</b> | <b>2</b>                  | <b>3</b>      | <b>4</b>      | <b>5</b>      |                  |
| <b>2</b>                  | 28                        | 0             | 0             | 0             | 28 (23,9%)       |
| <b>3</b>                  | 8                         | 27            | 0             | 0             | 35 (29,9%)       |
| <b>4</b>                  | 0                         | 1             | 21            | 0             | 22 (18,8%)       |
| <b>5</b>                  | 0                         | 0             | 0             | 32            | 32 (27,4%)       |
| <b>Total (%)</b>          | 36<br>(30,8%)             | 28<br>(23,9%) | 21<br>(17,9%) | 32<br>(27,4%) | 117              |

**Table S7:** Crosstab for inter-reader agreement between radiologist 2 and radiologist 3.

**Crosstabs for mpMRI-based PI-RADS v2.1 considering all PCa lesions (n = 78)**

|                             | <b>Radiologist1_withDCE</b> |              |               |               |                  |
|-----------------------------|-----------------------------|--------------|---------------|---------------|------------------|
| <b>Radiologist2_withDCE</b> | <b>2</b>                    | <b>3</b>     | <b>4</b>      | <b>5</b>      | <b>Total (%)</b> |
| <b>2</b>                    | 5                           | 4            | 0             | 0             | 9 (11,5%)        |
| <b>3</b>                    | 0                           | 2            | 3             | 0             | 5 (6,4%)         |
| <b>4</b>                    | 0                           | 3            | 30            | 0             | 33 (42,3%)       |
| <b>5</b>                    | 0                           | 0            | 0             | 31            | 31 (39,7%)       |
| <b>Total (%)</b>            | 5<br>(6,4%)                 | 9<br>(11,5%) | 33<br>(42,3%) | 31<br>(39,7%) | 78               |

**Table S8:** Crosstab for inter-reader agreement between radiologist 1 and radiologist 2.

|                             | <b>Radiologist1_withDCE</b> |              |               |               |                  |
|-----------------------------|-----------------------------|--------------|---------------|---------------|------------------|
| <b>Radiologist3_withDCE</b> | <b>2</b>                    | <b>3</b>     | <b>4</b>      | <b>5</b>      | <b>Total (%)</b> |
| <b>2</b>                    | 5                           | 2            | 0             | 0             | 7 (9,0%)         |
| <b>3</b>                    | 0                           | 5            | 2             | 0             | 7 (9,0%)         |
| <b>4</b>                    | 0                           | 2            | 31            | 0             | 33 (42,3%)       |
| <b>5</b>                    | 0                           | 0            | 0             | 31            | 31 (39,7%)       |
| <b>Total (%)</b>            | 5<br>(6,4%)                 | 9<br>(11,5%) | 33<br>(42,3%) | 31<br>(39,7%) | 78               |

**Table S9:** Crosstab for inter-reader agreement between radiologist 1 and radiologist 3.

|                             | <b>Radiologist2_withDCE</b> |             |               |               |                  |
|-----------------------------|-----------------------------|-------------|---------------|---------------|------------------|
| <b>Radiologist3_withDCE</b> | <b>2</b>                    | <b>3</b>    | <b>4</b>      | <b>5</b>      | <b>Total (%)</b> |
| <b>2</b>                    | 7                           | 0           | 0             | 0             | 7 (9,0%)         |
| <b>3</b>                    | 2                           | 4           | 1             | 0             | 7 (9,0%)         |
| <b>4</b>                    | 0                           | 1           | 32            | 0             | 33 (42,3%)       |
| <b>5</b>                    | 0                           | 0           | 0             | 31            | 31 (39,7%)       |
| <b>Total (%)</b>            | 9<br>(11,5%)                | 5<br>(6,4%) | 33<br>(42,3%) | 31<br>(39,7%) | 78               |

**Table S10:** Crosstab for inter-reader agreement between radiologist 2 and radiologist 3.

**Crosstabs for bpMRI-based PI-RADS v2.1 considering all PCa lesions (n = 78)**

|                           | <b>Radiologist1_noDCE</b> |               |               |               | <b>Total (%)</b> |
|---------------------------|---------------------------|---------------|---------------|---------------|------------------|
| <b>Radiologist2_noDCE</b> | <b>2</b>                  | <b>3</b>      | <b>4</b>      | <b>5</b>      |                  |
| <b>2</b>                  | 7                         | 2             | 0             | 0             | 9 (11,5%)        |
| <b>3</b>                  | 0                         | 20            | 2             | 0             | 22 (28,2%)       |
| <b>4</b>                  | 0                         | 6             | 10            | 0             | 16 (20,5%)       |
| <b>5</b>                  | 0                         | 0             | 0             | 31            | 31 (39,7%)       |
| <b>Total (%)</b>          | 7<br>(9,0%)               | 28<br>(35,9%) | 12<br>(15,4%) | 31<br>(39,7%) | 78               |

**Table S11:** Crosstab for inter-reader agreement between radiologist 1 and radiologist 2.

|                           | <b>Radiologist1_noDCE</b> |               |               |               | <b>Total (%)</b> |
|---------------------------|---------------------------|---------------|---------------|---------------|------------------|
| <b>Radiologist3_noDCE</b> | <b>2</b>                  | <b>3</b>      | <b>4</b>      | <b>5</b>      |                  |
| <b>2</b>                  | 7                         | 1             | 0             | 0             | 8 (10,3%)        |
| <b>3</b>                  | 0                         | 20            | 2             | 0             | 22 (28,2%)       |
| <b>4</b>                  | 0                         | 7             | 10            | 0             | 17 (21,8%)       |
| <b>5</b>                  | 0                         | 0             | 0             | 31            | 31 (39,7%)       |
| <b>Total (%)</b>          | 7<br>(9,0%)               | 28<br>(35,9%) | 12<br>(15,4%) | 31<br>(39,7%) | 78               |

**Table S12:** Crosstab for inter-reader agreement between radiologist 1 and radiologist 3.

|                           | <b>Radiologist2_noDCE</b> |               |               |               | <b>Total (%)</b> |
|---------------------------|---------------------------|---------------|---------------|---------------|------------------|
| <b>Radiologist3_noDCE</b> | <b>2</b>                  | <b>3</b>      | <b>4</b>      | <b>5</b>      |                  |
| <b>2</b>                  | 8                         | 0             | 0             | 0             | 8 (10,3%)        |
| <b>3</b>                  | 1                         | 21            | 0             | 0             | 22 (28,2%)       |
| <b>4</b>                  | 0                         | 1             | 16            | 0             | 17 (21,8%)       |
| <b>5</b>                  | 0                         | 0             | 0             | 31            | 31 (39,7%)       |
| <b>Total (%)</b>          | 9<br>(11,5%)              | 22<br>(28,2%) | 16<br>(20,5%) | 31<br>(39,7%) | 78               |

**Table S13:** Crosstab for inter-reader agreement between radiologist 2 and radiologist 3.

**Crosstabs for mpMRI-based PI-RADS v2.1 considering clinically significant PCa lesions (n = 41)**

|                             | <b>Radiologist1_withDCE</b> |             |               |               | <b>Total (%)</b> |
|-----------------------------|-----------------------------|-------------|---------------|---------------|------------------|
| <b>Radiologist2_withDCE</b> | <b>2</b>                    | <b>3</b>    | <b>4</b>      | <b>5</b>      |                  |
| <b>2</b>                    | 0                           | 1           | 0             | 0             | 1 (2,4%)         |
| <b>3</b>                    | 0                           | 2           | 1             | 0             | 3 (7,3%)         |
| <b>4</b>                    | 0                           | 0           | 15            | 0             | 15 (36,6%)       |
| <b>5</b>                    | 0                           | 0           | 0             | 22            | 22 (53,7%)       |
| <b>Total (%)</b>            | 0<br>(0,0%)                 | 3<br>(7,3%) | 16<br>(39,0%) | 22<br>(53,7%) | 41               |

**Table S14:** Crosstab for inter-reader agreement between radiologist 1 and radiologist 2.

|                             | <b>Radiologist1_withDCE</b> |               |               | <b>Total (%)</b> |
|-----------------------------|-----------------------------|---------------|---------------|------------------|
| <b>Radiologist3_withDCE</b> | <b>3</b>                    | <b>4</b>      | <b>5</b>      |                  |
| <b>3</b>                    | 3                           | 1             | 0             | 4 (9,8%)         |
| <b>4</b>                    | 0                           | 15            | 0             | 15 (36,6%)       |
| <b>5</b>                    | 0                           | 0             | 22            | 22 (53,7%)       |
| <b>Total (%)</b>            | 3<br>(7,3%)                 | 16<br>(39,0%) | 22<br>(53,7%) | 41               |

**Table S15:** Crosstab for inter-reader agreement between radiologist 1 and radiologist 3.

|                             | <b>Radiologist2_withDCE</b> |             |               |               | <b>Total (%)</b> |
|-----------------------------|-----------------------------|-------------|---------------|---------------|------------------|
| <b>Radiologist3_withDCE</b> | <b>2</b>                    | <b>3</b>    | <b>4</b>      | <b>5</b>      |                  |
| <b>2</b>                    | 0                           | 0           | 0             | 0             | 0 (0,0%)         |
| <b>3</b>                    | 1                           | 3           | 0             | 0             | 4 (9,8%)         |
| <b>4</b>                    | 0                           | 0           | 15            | 0             | 15 (36,6%)       |
| <b>5</b>                    | 0                           | 0           | 0             | 22            | 22 (53,7%)       |
| <b>Total (%)</b>            | 1<br>(2,4%)                 | 3<br>(7,3%) | 15<br>(36,6%) | 22<br>(53,7%) | 41               |

**Table S16:** Crosstab for inter-reader agreement between radiologist 2 and radiologist 3.

**Crosstabs for bpMRI-based PI-RADS v2.1 considering clinically significant PCa lesions (n = 41)**

|                           | <b>Radiologist1_noDCE</b> |               |              |               | <b>Total (%)</b> |
|---------------------------|---------------------------|---------------|--------------|---------------|------------------|
| <b>Radiologist2_noDCE</b> | <b>2</b>                  | <b>3</b>      | <b>4</b>     | <b>5</b>      |                  |
| 2                         | 0                         | 1             | 0            | 0             | 1 (2,4%)         |
| 3                         | 0                         | 7             | 1            | 0             | 8 (19,5%)        |
| 4                         | 0                         | 4             | 6            | 0             | 10 (24,4%)       |
| 5                         | 0                         | 0             | 0            | 22            | 22 (53,7%)       |
| <b>Total (%)</b>          | 0<br>(0,0%)               | 12<br>(29,3%) | 7<br>(17,1%) | 22<br>(53,7%) | 41               |

**Table S17:** Crosstab for inter-reader agreement between radiologist 1 and radiologist 2.

|                           | <b>Radiologist1_noDCE</b> |              |               | <b>Total (%)</b> |
|---------------------------|---------------------------|--------------|---------------|------------------|
| <b>Radiologist3_noDCE</b> | <b>3</b>                  | <b>4</b>     | <b>5</b>      |                  |
| 3                         | 7                         | 1            | 0             | 8 (19,5%)        |
| 4                         | 5                         | 6            | 0             | 11 (26,8%)       |
| 5                         | 0                         | 0            | 22            | 22 (53,7%)       |
| <b>Total (%)</b>          | 12<br>(29,3%)             | 7<br>(17,1%) | 22<br>(53,7%) | 41               |

**Table S18:** Crosstab for inter-reader agreement between radiologist 1 and radiologist 3.

|                           | <b>Radiologist2_noDCE</b> |              |               |               | <b>Total (%)</b> |
|---------------------------|---------------------------|--------------|---------------|---------------|------------------|
| <b>Radiologist3_noDCE</b> | <b>2</b>                  | <b>3</b>     | <b>4</b>      | <b>5</b>      |                  |
| 2                         | 0                         | 0            | 0             | 0             | 0 (0,0%)         |
| 3                         | 1                         | 7            | 0             | 0             | 8 (19,5%)        |
| 4                         | 0                         | 1            | 10            | 0             | 11 (26,8%)       |
| 5                         | 0                         | 0            | 0             | 22            | 22 (53,7%)       |
| <b>Total (%)</b>          | 1<br>(2,4%)               | 8<br>(19,5%) | 10<br>(24,4%) | 22<br>(53,7%) | 41               |

**Table S19:** Crosstab for inter-reader agreement between radiologist 2 and radiologist 3.

**Crosstabs for mpMRI-based PI-RADS v2.1 considering non-PCa lesions (n = 39)**

|                             | <b>Radiologist1_withDCE</b> |              |               |             | <b>Total (%)</b> |
|-----------------------------|-----------------------------|--------------|---------------|-------------|------------------|
| <b>Radiologist2_withDCE</b> | <b>2</b>                    | <b>3</b>     | <b>4</b>      | <b>5</b>    |                  |
| <b>2</b>                    | 20                          | 5            | 1             | 0           | 26 (66,7%)       |
| <b>3</b>                    | 0                           | 3            | 1             | 0           | 4 (10,3%)        |
| <b>4</b>                    | 0                           | 0            | 8             | 0           | 8 (20,5%)        |
| <b>5</b>                    | 0                           | 0            | 0             | 1           | 1 (2,6%)         |
| <b>Total (%)</b>            | 20<br>(51,3%)               | 8<br>(20,5%) | 10<br>(25,6%) | 1<br>(2,6%) | 39               |

**Table S20:** Crosstab for inter-reader agreement between radiologist 1 and radiologist 2.

|                             | <b>Radiologist1_withDCE</b> |              |               |             | <b>Total (%)</b> |
|-----------------------------|-----------------------------|--------------|---------------|-------------|------------------|
| <b>Radiologist3_withDCE</b> | <b>2</b>                    | <b>3</b>     | <b>4</b>      | <b>5</b>    |                  |
| <b>2</b>                    | 19                          | 1            | 0             | 0           | 20 (51,3%)       |
| <b>3</b>                    | 1                           | 6            | 1             | 0           | 8 (20,5%)        |
| <b>4</b>                    | 0                           | 1            | 9             | 0           | 10 (25,6%)       |
| <b>5</b>                    | 0                           | 0            | 0             | 1           | 1 (2,6%)         |
| <b>Total (%)</b>            | 20<br>(51,3%)               | 8<br>(20,5%) | 10<br>(25,6%) | 1<br>(2,6%) | 39               |

**Table S21:** Crosstab for inter-reader agreement between radiologist 1 and radiologist 3.

|                             | <b>Radiologist2_withDCE</b> |              |              |             | <b>Total (%)</b> |
|-----------------------------|-----------------------------|--------------|--------------|-------------|------------------|
| <b>Radiologist3_withDCE</b> | <b>2</b>                    | <b>3</b>     | <b>4</b>     | <b>5</b>    |                  |
| <b>2</b>                    | 20                          | 0            | 0            | 0           | 20 (51,3%)       |
| <b>3</b>                    | 5                           | 3            | 0            | 0           | 8 (20,5%)        |
| <b>4</b>                    | 1                           | 1            | 8            | 0           | 10 (25,6%)       |
| <b>5</b>                    | 0                           | 0            | 0            | 1           | 1 (2,6%)         |
| <b>Total (%)</b>            | 26<br>(66,7%)               | 4<br>(10,3%) | 8<br>(20,5%) | 1<br>(2,6%) | 39               |

**Table S22:** Crosstab for inter-reader agreement between radiologist 2 and radiologist 3.



**Crosstabs for bpMRI-based PI-RADS v2.1 considering non-PCa lesions (n = 39)**

|                           | <b>Radiologist1_noDCE</b> |               |             |             | <b>Total (%)</b> |
|---------------------------|---------------------------|---------------|-------------|-------------|------------------|
| <b>Radiologist2_noDCE</b> | <b>2</b>                  | <b>3</b>      | <b>4</b>    | <b>5</b>    |                  |
| <b>2</b>                  | 20                        | 7             | 0           | 0           | 27 (69,2%)       |
| <b>3</b>                  | 0                         | 5             | 1           | 0           | 6 (15,4%)        |
| <b>4</b>                  | 0                         | 3             | 2           | 0           | 5 (12,8%)        |
| <b>5</b>                  | 0                         | 0             | 0           | 1           | 1 (2,6%)         |
| <b>Total (%)</b>          | 20<br>(51,3%)             | 15<br>(38,5%) | 3<br>(7,7%) | 1<br>(2,6%) | 39               |

**Table S23:** Crosstab for inter-reader agreement between radiologist 1 and radiologist 2.

|                           | <b>Radiologist1_noDCE</b> |               |             |             | <b>Total (%)</b> |
|---------------------------|---------------------------|---------------|-------------|-------------|------------------|
| <b>Radiologist3_noDCE</b> | <b>2</b>                  | <b>3</b>      | <b>4</b>    | <b>5</b>    |                  |
| <b>2</b>                  | 19                        | 1             | 0           | 0           | 20 (51,3%)       |
| <b>3</b>                  | 1                         | 11            | 1           | 0           | 13 (33,3%)       |
| <b>4</b>                  | 0                         | 3             | 2           | 0           | 5 (12,8%)        |
| <b>5</b>                  | 0                         | 0             | 0           | 1           | 1 (2,6%)         |
| <b>Total (%)</b>          | 20<br>(51,3%)             | 15<br>(38,5%) | 3<br>(7,7%) | 1<br>(2,6%) | 39               |

**Table S24:** Crosstab for inter-reader agreement between radiologist 1 and radiologist 3.

|                           | <b>Radiologist2_noDCE</b> |              |              |             | <b>Total (%)</b> |
|---------------------------|---------------------------|--------------|--------------|-------------|------------------|
| <b>Radiologist3_noDCE</b> | <b>2</b>                  | <b>3</b>     | <b>4</b>     | <b>5</b>    |                  |
| <b>2</b>                  | 20                        | 0            | 0            | 0           | 20 (51,3%)       |
| <b>3</b>                  | 7                         | 6            | 0            | 0           | 13 (33,3%)       |
| <b>4</b>                  | 0                         | 0            | 5            | 0           | 5 (12,8%)        |
| <b>5</b>                  | 0                         | 0            | 0            | 1           | 1 (2,6%)         |
| <b>Total (%)</b>          | 27<br>(69,2%)             | 6<br>(15,4%) | 5<br>(12,8%) | 1<br>(2,6%) | 39               |

**Table S25:** Crosstab for inter-reader agreement between radiologist 2 and radiologist 3.

## Crosstabs for inter-method agreement

Crosstabs for agreement between mpMRI- and bpMRI-based PI-RADS v2.1 considering all lesions (n = 117)

|                    | Radiologist1_withDCE |               |               |               | Total (%)  |
|--------------------|----------------------|---------------|---------------|---------------|------------|
| Radiologist1_noDCE | 2                    | 3             | 4             | 5             |            |
| 2                  | 25                   | 2             | 0             | 0             | 27 (23,1%) |
| 3                  | 0                    | 15            | 28            | 0             | 43 (36,8%) |
| 4                  | 0                    | 0             | 15            | 0             | 15 (12,8%) |
| 5                  | 0                    | 0             | 0             | 32            | 32 (27,4%) |
| <b>Total (%)</b>   | 25<br>(21,4%)        | 17<br>(14,5%) | 43<br>(36,8%) | 32<br>(27,4%) | 117        |

**Table S26:** Crosstab for inter-method agreement for radiologist 1.

|                    | Radiologist2_withDCE |             |               |               | Total (%)  |
|--------------------|----------------------|-------------|---------------|---------------|------------|
| Radiologist2_noDCE | 2                    | 3           | 4             | 5             |            |
| 2                  | 35                   | 1           | 0             | 0             | 36 (30,8%) |
| 3                  | 0                    | 8           | 20            | 0             | 28 (23,9%) |
| 4                  | 0                    | 0           | 21            | 0             | 21 (17,9%) |
| 5                  | 0                    | 0           | 0             | 32            | 32 (27,4%) |
| <b>Total (%)</b>   | 35<br>(29,9%)        | 9<br>(7,7%) | 41<br>(35,0%) | 32<br>(27,4%) | 117        |

**Table S27:** Crosstab for inter-method agreement for radiologist 2.

|                    | Radiologist3_withDCE |               |               |               | Total (%)  |
|--------------------|----------------------|---------------|---------------|---------------|------------|
| Radiologist3_noDCE | 2                    | 3             | 4             | 5             |            |
| 2                  | 27                   | 1             | 0             | 0             | 28 (23,9%) |
| 3                  | 0                    | 14            | 21            | 0             | 35 (29,9%) |
| 4                  | 0                    | 0             | 22            | 0             | 22 (18,8%) |
| 5                  | 0                    | 0             | 0             | 32            | 32 (27,4%) |
| <b>Total (%)</b>   | 27<br>(23,1%)        | 15<br>(12,8%) | 43<br>(36,8%) | 32<br>(27,4%) | 117        |

**Table S28:** Crosstab for inter-method agreement for radiologist 3.

**Crosstabs for agreement between mpMRI- and bpMRI-based PI-RADS v2.1 considering all PCa lesions (n = 78)**

|                           | <b>Radiologist1_withDCE</b> |              |               |               | <b>Total (%)</b> |
|---------------------------|-----------------------------|--------------|---------------|---------------|------------------|
| <b>Radiologist1_noDCE</b> | <b>2</b>                    | <b>3</b>     | <b>4</b>      | <b>5</b>      |                  |
| <b>2</b>                  | 5                           | 2            | 0             | 0             | 7 (9,0%)         |
| <b>3</b>                  | 0                           | 7            | 21            | 0             | 28 (35,9%)       |
| <b>4</b>                  | 0                           | 0            | 12            | 0             | 12 (15,4%)       |
| <b>5</b>                  | 0                           | 0            | 0             | 31            | 31 (39,7%)       |
| <b>Total (%)</b>          | 5<br>(6,4%)                 | 9<br>(11,5%) | 33<br>(42,3%) | 31<br>(39,7%) | 78               |

**Table S29:** Crosstab for inter-method agreement for radiologist 1.

|                           | <b>Radiologist2_withDCE</b> |             |               |               | <b>Total (%)</b> |
|---------------------------|-----------------------------|-------------|---------------|---------------|------------------|
| <b>Radiologist2_noDCE</b> | <b>2</b>                    | <b>3</b>    | <b>4</b>      | <b>5</b>      |                  |
| <b>2</b>                  | 9                           | 0           | 0             | 0             | 9 (11,5%)        |
| <b>3</b>                  | 0                           | 5           | 17            | 0             | 22 (28,2%)       |
| <b>4</b>                  | 0                           | 0           | 16            | 0             | 16 (20,5%)       |
| <b>5</b>                  | 0                           | 0           | 0             | 31            | 31 (39,7%)       |
| <b>Total (%)</b>          | 9<br>(11,5%)                | 5<br>(6,4%) | 33<br>(42,3%) | 31<br>(39,7%) | 78               |

**Table S30:** Crosstab for inter-method agreement for radiologist 2.

|                           | <b>Radiologist3_withDCE</b> |             |               |               | <b>Total (%)</b> |
|---------------------------|-----------------------------|-------------|---------------|---------------|------------------|
| <b>Radiologist3_noDCE</b> | <b>2</b>                    | <b>3</b>    | <b>4</b>      | <b>5</b>      |                  |
| <b>2</b>                  | 7                           | 1           | 0             | 0             | 8 (10,3%)        |
| <b>3</b>                  | 0                           | 6           | 16            | 0             | 22 (28,2%)       |
| <b>4</b>                  | 0                           | 0           | 17            | 0             | 17 (21,8%)       |
| <b>5</b>                  | 0                           | 0           | 0             | 31            | 31 (39,7%)       |
| <b>Total (%)</b>          | 7<br>(9,0%)                 | 7<br>(9,0%) | 33<br>(42,3%) | 31<br>(39,7%) | 78               |

**Table S31:** Crosstab for inter-method agreement for radiologist 3

**Crosstabs for agreement between mpMRI- and bpMRI-based PI-RADS v2.1 considering clinically significant PCa lesions (n = 41)**

|                           | <b>Radiologist1_withDCE</b> |               |               | <b>Total (%)</b> |
|---------------------------|-----------------------------|---------------|---------------|------------------|
| <b>Radiologist1_noDCE</b> | <b>3</b>                    | <b>4</b>      | <b>5</b>      |                  |
| <b>3</b>                  | 3                           | 9             | 0             | 12 (29,3%)       |
| <b>4</b>                  | 0                           | 7             | 0             | 7 (17,1%)        |
| <b>5</b>                  | 0                           | 0             | 22            | 22 (53,7%)       |
| <b>Total (%)</b>          | 3<br>(7,3%)                 | 16<br>(39,0%) | 22<br>(53,7%) | 41               |

**Table S32:** Crosstab for inter-method agreement for radiologist 1.

|                           | <b>Radiologist2_withDCE</b> |             |               |               | <b>Total (%)</b> |
|---------------------------|-----------------------------|-------------|---------------|---------------|------------------|
| <b>Radiologist2_noDCE</b> | <b>2</b>                    | <b>3</b>    | <b>4</b>      | <b>5</b>      |                  |
| <b>2</b>                  | 1                           | 0           | 0             | 0             | 1 (2,4%)         |
| <b>3</b>                  | 0                           | 3           | 5             | 0             | 8 (19,5%)        |
| <b>4</b>                  | 0                           | 0           | 10            | 0             | 10 (24,4%)       |
| <b>5</b>                  | 0                           | 0           | 0             | 22            | 22 (53,7%)       |
| <b>Total (%)</b>          | 1<br>(2,4%)                 | 3<br>(7,3%) | 15<br>(36,6%) | 22<br>(53,7%) | 41               |

**Table S33:** Crosstab for inter-method agreement for radiologist 2.

|                           | <b>Radiologist3_withDCE</b> |               |               | <b>Total (%)</b> |
|---------------------------|-----------------------------|---------------|---------------|------------------|
| <b>Radiologist3_noDCE</b> | <b>3</b>                    | <b>4</b>      | <b>5</b>      |                  |
| <b>3</b>                  | 4                           | 4             | 0             | 8 (19,5%)        |
| <b>4</b>                  | 0                           | 11            | 0             | 11 (26,8%)       |
| <b>5</b>                  | 0                           | 0             | 22            | 22 (53,7%)       |
| <b>Total (%)</b>          | 4<br>(9,8%)                 | 15<br>(36,6%) | 22<br>(53,7%) | 41               |

**Table S34:** Crosstab for inter-method agreement for radiologist 3.

**Crosstabs for agreement between mpMRI- and bpMRI-based PI-RADS v2.1 considering non-PCa lesions (n = 39)**

|                           | <b>Radiologist1_withDCE</b> |              |               |             | <b>Total (%)</b> |
|---------------------------|-----------------------------|--------------|---------------|-------------|------------------|
| <b>Radiologist1_noDCE</b> | <b>2</b>                    | <b>3</b>     | <b>4</b>      | <b>5</b>    |                  |
| <b>2</b>                  | 20                          | 0            | 0             | 0           | 20 (51,3%)       |
| <b>3</b>                  | 0                           | 8            | 7             | 0           | 15 (38,5%)       |
| <b>4</b>                  | 0                           | 0            | 3             | 0           | 3 (7,7%)         |
| <b>5</b>                  | 0                           | 0            | 0             | 1           | 1 (2,6%)         |
| <b>Total (%)</b>          | 20<br>(51,3%)               | 8<br>(20,5%) | 10<br>(25,6%) | 1<br>(2,6%) | 39               |

**Table S35:** Crosstab for inter-method agreement for radiologist 1.

|                           | <b>Radiologist2_withDCE</b> |              |              |             | <b>Total (%)</b> |
|---------------------------|-----------------------------|--------------|--------------|-------------|------------------|
| <b>Radiologist2_noDCE</b> | <b>2</b>                    | <b>3</b>     | <b>4</b>     | <b>5</b>    |                  |
| <b>2</b>                  | 26                          | 1            | 0            | 0           | 27 (69,2%)       |
| <b>3</b>                  | 0                           | 3            | 3            | 0           | 6 (15,4%)        |
| <b>4</b>                  | 0                           | 0            | 5            | 0           | 5 (12,8%)        |
| <b>5</b>                  | 0                           | 0            | 0            | 1           | 1 (2,6%)         |
| <b>Total (%)</b>          | 26<br>(66,7%)               | 4<br>(10,3%) | 8<br>(20,5%) | 1<br>(2,6%) | 39               |

**Table S36:** Crosstab for inter-method agreement for radiologist 2.

|                           | <b>Radiologist3_withDCE</b> |              |               |             | <b>Total (%)</b> |
|---------------------------|-----------------------------|--------------|---------------|-------------|------------------|
| <b>Radiologist3_noDCE</b> | <b>2</b>                    | <b>3</b>     | <b>4</b>      | <b>5</b>    |                  |
| <b>2</b>                  | 20                          | 0            | 0             | 0           | 20 (51,3%)       |
| <b>3</b>                  | 0                           | 8            | 5             | 0           | 13 (33,3%)       |
| <b>4</b>                  | 0                           | 0            | 5             | 0           | 5 (12,8%)        |
| <b>5</b>                  | 0                           | 0            | 0             | 1           | 1 (2,6%)         |
| <b>Total (%)</b>          | 20<br>(51,3%)               | 8<br>(20,5%) | 10<br>(25,6%) | 1<br>(2,6%) | 39               |

**Table S37:** Crosstab for inter-method agreement for radiologist 3.

**Crosstabs for agreement between mpMRI- and bpMRI-based PI-RADS v2.1 considering all PCa lesions in PZ (n = 66)**

|                           | <b>Radiologist1_withDCE</b> |              |               |               | <b>Total (%)</b> |
|---------------------------|-----------------------------|--------------|---------------|---------------|------------------|
| <b>Radiologist1_noDCE</b> | <b>2</b>                    | <b>3</b>     | <b>4</b>      | <b>5</b>      |                  |
| <b>2</b>                  | 4                           | 2            | 0             | 0             | 6 (9,1%)         |
| <b>3</b>                  | 0                           | 7            | 18            | 0             | 25 (37,9%)       |
| <b>4</b>                  | 0                           | 0            | 10            | 0             | 10 (15,2%)       |
| <b>5</b>                  | 0                           | 0            | 0             | 25            | 25 (37,9%)       |
| <b>Total (%)</b>          | 4<br>(6,1%)                 | 9<br>(13,6%) | 28<br>(42,4%) | 25<br>(37,9%) | 66               |

**Table S38:** Crosstab for inter-method agreement for radiologist 1.

|                           | <b>Radiologist2_withDCE</b> |             |               |               | <b>Total (%)</b> |
|---------------------------|-----------------------------|-------------|---------------|---------------|------------------|
| <b>Radiologist2_noDCE</b> | <b>2</b>                    | <b>3</b>    | <b>4</b>      | <b>5</b>      |                  |
| <b>2</b>                  | 8                           | 0           | 0             | 0             | 8 (12,1%)        |
| <b>3</b>                  | 0                           | 4           | 15            | 0             | 19 (28,8%)       |
| <b>4</b>                  | 0                           | 0           | 14            | 0             | 14 (21,2%)       |
| <b>5</b>                  | 0                           | 0           | 0             | 25            | 25 (37,9%)       |
| <b>Total (%)</b>          | 8<br>(12,1%)                | 4<br>(6,1%) | 29<br>(43,9%) | 25<br>(37,9%) | 66               |

**Table S39:** Crosstab for inter-method agreement for radiologist 2.

|                           | <b>Radiologist3_withDCE</b> |             |               |               | <b>Total (%)</b> |
|---------------------------|-----------------------------|-------------|---------------|---------------|------------------|
| <b>Radiologist3_noDCE</b> | <b>2</b>                    | <b>3</b>    | <b>4</b>      | <b>5</b>      |                  |
| <b>2</b>                  | 6                           | 1           | 0             | 0             | 7 (10,6%)        |
| <b>3</b>                  | 0                           | 6           | 16            | 0             | 19 (28,8%)       |
| <b>4</b>                  | 0                           | 0           | 17            | 0             | 15 (22,7%)       |
| <b>5</b>                  | 0                           | 0           | 0             | 25            | 25 (37,9%)       |
| <b>Total (%)</b>          | 6<br>(9,1%)                 | 6<br>(9,1%) | 29<br>(43,9%) | 25<br>(37,9%) | 66               |

**Table S40:** Crosstab for inter-method agreement for radiologist 3
